# Supplementary material
Source: publisher site journal article supplement (https://www.dovepress.com/article/332793)
Supplement: Supplementary file 1 [file get_supplementary_file.php]

**Supplemental Figure 1: Stress increases *Reg3b* and *Reg3g* expression in the ileum in a microbe-dependent manner.** Mice exposed to stress had increased *Reg3b* and *Reg3g* gene expression in the ileum, but treatment with antibiotics prevented this increase (stress x antibiotic interaction, p<.05). However, CD14-/- mice exposed to stress did not have increases in either *Reg3b* or *Reg3g* in the ileum. *p<.05 vs. all other groups via protected t post-hoc test. n=6-9 mice per group from 3 replicate experiments.

*Reg3g*

*Reg3g*

*

CD14-/-

WT

b)

a)

WT

CD14-/-

*

*Reg3b*

*Reg3b*

| *Supplemental Table 1: Colon Relative Abundances* | | |  |  |
| --- | --- | --- | --- | --- |
|  | **Ctrl Veh** | **Stress Veh** | **Ctrl Abx** | **Stress Abx** |
| *Muribaculaceae_uc* | 17.08+/-3.01 | 25.23+/-4.55 | 12.42+/-3.38 | 10.16+/-2.14 |
| *Lachnospiraceae NK4A136 Group* | 14.13+/-3.39 | 11.58+/-3.30 | 0.20+/-0.08 | 1.75+/-1.07 |
| *Lactobacillus* | 10.48+/-2.79 | 9.40+/-4.03 | 1.29+/-0.34 | 2.70+/-1.01 |
| *Ruminococcaceae UCG-014* | 10.44+/-1.07 | 6.51+/-1.22 | 0.44+/-0.22 | 0.11+/-0.04 |
| *Bacteroides* | 8.57+/-1.76 | 3.76+/-0.65 | 37.81+/-9.72 | 17.63+/-2.74 |
| *Alistipes* | 5.76+/-1.84 | 5.55+/-1.70 | 2.10+/-0.57 | 7.40+/-2.01 |
| *Muribaculaceae;_* | <0.01 | 7.35+/-2.36 | 0.06+/-0.04 | 0.84+/-0.39 |
| *Lachnospiraceae;_* | 4.43+/-1.48 | 3.70+/-0.93 | 0.32+/-0.14 | 0.72+/-0.23 |
| *Lachnospiraceae_uc* | 4.33+/-0.87 | 3.39+/-0.74 | 0.09+/-0.04 | 0.15+/-0.07 |
| *Lachnospiraceae; Roseburia* | 2.13+/-0.45 | 2.66+/-0.83 | 0.18+/-0.08 | 0.74+/-0.26 |
| *Mollicutes RF39_uc* | 3.26+/-0.87 | 1.68+/-0.49 | <0.01 | 0.16+/-0.16 |
| *Ruminiclostridium 9* | 1.91+/-0.24 | 1.85+/-0.25 | 0.14+/-0.05 | 0.64+/-0.22 |
| *Mollicutes RF39;_;_* | 1.57+/-0.26 | 1.00+/-0.20 | <0.01 | <0.01 |
| *Muribaculaceae; unidentified* | <0.01 | 1.86+/-0.80 | <0.01 | 0.05+/-0.04 |
| *Ruminiclostridium 6* | 1.18+/-0.28 | 0.60+/-0.40 | <0.01 | 0.26+/-0.17 |
| *Ruminococcaceae;_* | 0.87+/-0.18 | 0.79+/-0.24 | 0.08+/-0.04 | 0.21+/-0.10 |
| *[Eubacterium] xylanophilum group* | 1.00+/-0.23 | 0.57+/-0.10 | <0.01 | <0.01 |
| *Ruminococcus 1* | 0.63+/-0.19 | 0.79+/-0.23 | <0.01 | <0.01 |
| *Prevotellaceae UCG-001* | <0.01 | 1.21+/-0.49 | <0.01 | 0.78+/-0.52 |
| *Erysipelotrichaceae_uc* | 1.23+/-0.34 | 0.23+/-0.03 | 0.12+/-0.03 | 0.21+/-0.04 |
| *Mollicutes RF39; Unidentified;_* | 0.78+/-0.13 | 0.49+/-0.17 | <0.01 | <0.01 |
| *Muribaculaceae_uc* | <0.01 | 1.06+/-0.24 | <0.01 | 0.02+/-0.01 |
| *Lachnoclostridium* | 0.79+/-0.16 | 0.43+/-0.08 | 0.02+/-0.01 | 0.14+/-0.06 |
| *Ruminococcaceae_uc* | 0.57+/-0.14 | 0.52+/-0.12 | 0.39+/-0.24 | 1.67+/-0.88 |
| *Peptococcaceae_uc* | 0.58+/-0.07 | 0.48+/-0.11 | <0.01 | <0.01 |
| *Oscillibacter* | 0.44+/-0.12 | 0.49+/-0.13 | 0.05+/-0.03 | 0.11+/-0.04 |
| *[Eubacterium] coprostanoligens gr* | 0.65+/-0.16 | 0.28+/-0.06 | <0.01 | <0.01 |
| *Ruminiclostridium* | 0.35+/-0.10 | 0.48+/-0.16 | 0.10+/-0.05 | 0.34+/-0.18 |
| *Muribaculum* | <0.01 | 0.73+/-0.33 | <0.01 | 0.10+/-0.07 |
| *Lachnospiraceae; A2* | 0.67+/-0.29 | 0.15+/-0.06 | 0.88+/-0.26 | 1.55+/-0.47 |
| *Parabacteroides* | 0.47+/-0.10 | 0.26+/-0.05 | 5.81+/-0.83 | 8.54+/-1.62 |
| *Lachnospiraceae UCG-006* | 0.40+/-0.08 | 0.27+/-0.06 | 0.44+/-0.22 | 0.76+/-0.28 |
| *Ruminiclostridium 5* | 0.27+/-0.05 | 0.32+/-0.09 | <0.01 | <0.01 |
| *Lachnospiraceae; GCA-900066575* | 0.32+/-0.09 | 0.23+/-0.08 | 0.09+/-0.03 | 0.18+/-0.05 |
| *Ruminococcaceae UCG-013* | 0.36+/-0.08 | 0.20+/-0.07 | 0.03+/-0.02 | 0.04+/-0.02 |
| *Candidatus Arthromitus* | 0.21+/-0.02 | 0.23+/-0.06 | <0.01 | <0.01 |
| *Blautia* | 0.22+/-0.08 | 0.22+/-0.11 | <0.01 | <0.01 |
| *Candidatus Saccharimonas* | 0.35+/-0.09 | 0.11+/-0.03 | <0.01 | <0.01 |
| *Mucispirillum* | 0.22+/-0.11 | 0.17+/-0.08 | 0.03+/-0.02 | 0.12+/-0.07 |
| *Clostridiales vadinBB60 group* | 0.24+/-0.08 | 0.14+/-0.04 | 0.10+/-0.02 | 0.14+/-0.05 |
| *Lachnospiraceae UCG-001* | 0.15+/-0.06 | 0.21+/-0.07 | 0.02+/-0.01 | <0.01 |
| *Uc_firmicutes bacterium* | 0.11+/-0.02 | 0.17+/-0.09 | <0.01 | <0.01 |
| *Butyricicoccus* | 0.11+/-0.04 | 0.17+/-0.05 | <0.01 | <0.01 |
| *Ruminococcaceae NK4A214 group* | 0.18+/-0.04 | 0.11+/-0.02 | 0.02+/-0.02 | <0.01 |
| *Helicobacter* | <0.01 | 0.24+/-0.16 | <0.01 | <0.01 |
| *Ruminococcaceae UCG-010* | 0.16+/-0.03 | 0.09+/-0.02 | <0.01 | <0.01 |
| *Erysipelatoclostridium* | 0.22+/-0.07 | 0.02+/-0.01 | 3.58+/-0.78 | 4.27+/-0.76 |
| *Anaerotruncus* | 0.08+/-0.02 | 0.13+/-0.06 | <0.01 | <0.01 |
| *[Eubacterium] ventriosum group* | 0.15+/-0.12 | 0.07+/-0.04 | <0.01 | <0.01 |
| *Enterorhabdus* | 0.13+/-0.03 | 0.08+/-0.05 | <0.01 | <0.01 |
| *Intestinimonas* | 0.13+/-0.03 | 0.06+/-0.01 | <0.01 | <0.01 |
| *Ruminococcaceae; UBA1819* | 0.12+/-0.05 | 0.07+/-0.03 | <0.01 | 0.02+/-0.01 |
| *Uc_Lachnospiraceae bacterium* | 0.08+/-0.02 | 0.09+/-0.05 | <0.01 | <0.01 |
| *Ruminococcaceae UCG-005* | 0.10+/-0.02 | 0.08+/-0.02 | <0.01 | <0.01 |
| *Ruminococcaceae GCA-90066225* | 0.10+/-0.02 | 0.07+/-0.01 | <0.01 | <0.01 |
| *Tyzzerella 3* | <0.01 | 0.10+/-0.03 | <0.01 | <0.01 |
| *Clostridiales vadinBB60_uc* | 0.10+/-0.03 | <0.01 | 0.06+/-0.03 | 0.08+/-0.02 |
| *Eggerthellaceae_uc* | 0.05+/-0.01 | 0.06+/-0.03 | <0.01 | <0.01 |
| *Lachnospiraceae UCG-004* | 0.08+/-0.02 | 0.04+/-0.01 | <0.01 | <0.01 |
| *Defluviitaleaceae UCG-011* | 0.07+/-0.01 | <0.01 | <0.01 | <0.01 |

| Supplemental Table 2: Ileum Relative Abundances | | |  |  |
| --- | --- | --- | --- | --- |
|  | **Ctrl Veh** | **Stress Veh** | **Ctrl Abx** | **Stress Abx** |
| *Lactobacillus* | 36.03+/-10.01 | 59.04+/-11.27 | 35.56+/-6.86 | 56.85+/-8.37 |
| *Candidatus Arthromitus* | 35.26+/-13.01 | 25.65+/-10.83 | 0.02+/-0.01 | <0.01 |
| *Muribaculaceae_uc* | 10.22+/-6.39 | 5.68+/-2.54 | 6.10+/-2.81 | 5.66+/-2.09 |
| *Bacteria;_;_;_;_;_* | 4.65+/-4.21 | 0.04+/-0.02 | 3.29+/-1.27 | 0.41+/-0.28 |
| *Lachnospiraceae NK4A136 group* | 3.21+/-2.24 | 0.58+/-0.13 | 1.13+/-0.69 | 0.17+/-0.06 |
| *Muribaculaceae;_* | 0.06+/-0.04 | 1.31+/-0.95 | <0.01 | 0.23+/-0.13 |
| *Staphylococcus* | 1.26+/-1.22 | 0.20+/-0.08 | 0.63+/-0.63 | 0.26+/-0.10 |
| *Muribaculaceae_uc Bacteroidales bacteriu* | <0.01 | 1.03+/-0.44 | <0.01 | 0.03+/-0.02 |
| *Lachnospiraceae;_* | 0.87+/-0.56 | 0.23+/-0.08 | 0.24+/-0.11 | 0.18+/-0.06 |
| *Roseburia* | 0.86+/-0.66 | 0.23+/-0.08 | 0.66+/-0.65 | 0.18+/-0.08 |
| *Streptococcus* | 0.08+/-0.04 | 0.88+/-0.31 | 1.06+/-7.27 | 2.56+/-1.09 |
| *Akkermansiacea* | 0.87+/-0.67 | 0.13+/-0.08 | 5.84+/-4.44 | 16.92+/-6.32 |
| *Chloroplast_;_* | 0.25+/-0.17 | 0.57+/-0.24 | 2.43+/-1.67 | 2.01+/-0.64 |
| *Lachnospiraceae_uc* | 0.55+/-0.33 | 0.19+/-0.08 | 0.24+/-0.17 | 0.04+/-0.02 |
| *Rickettsiales;Mitochondria;_* | 0.22+/-0.18 | 0.48+/-0.27 | 1.94+/-1.14 | 1.41+/-0.62 |
| *Bacteroides* | 0.60+/-0.40 | 0.08+/-0.02 | 2.68+/-1.22 | 1.53+/-0.64 |
| *Lachnospiraceae;A2* | 0.47+/-0.39 | 0.03+/-0.02 | 0.39+/-0.27 | 0.49+/-0.22 |
| *Halomonas* | 0.39+/-0.32 | 0.09+/-0.03 | 1.83+/-1.29 | 0.38+/-0.21 |
| *Ruminococcaceae UCG-014* | 0.34+/-0.16 | 0.10+/-0.04 | 0.15+/-0.15 | 0.03+/-0.01 |
| *Alistipes* | 0.29+/-0.26 | 0.03+/-0.02 | 0.28+/-0.12 | 0.43+/-0.20 |
| *Lachnospiraceae UCG-006* | 0.23+/-0.11 | 0.05+/-0.02 | 0.12+/-0.10 | 0.16+/-0.06 |
| *Lachnoclostridium* | 0.18+/-0.08 | 0.07+/-0.03 | 0.05+/-0.03 | 0.13+/-0.06 |
| *Erysipelatoclostridium* | 0.20+/-0.12 | <0.01 | 0.30+/-0.15 | 0.28+/-0.08 |
| *Parabacteroides* | 0.15+/-0.09 | 0.03+/-0.02 | 0.77+/-0.51 | 0.45+/-0.23 |
| *Ruminococcaceae_uc* | 0.11+/-0.07 | 0.02+/-0.01 | 0.02+/-0.02 | 0.13+/-0.04 |
| *Oscillibacter* | 0.12+/-0.11 | <0.01 | <0.01 | 0.03+/-0.02 |
| *Candidatus Saccharimonas* | 0.11+/-0.10 | <0.01 | <0.01 | <0.01 |
| *Ruminiclostridium 9* | 0.09+/-0.08 | <0.01 | 0.36+/-0.21 | 0.22+/-0.10 |
| *Proteus* | 0.01+/-0.01 | 0.09+/-0.08 | 0.32+/-0.26 | 0.26+/-0.17 |
| *Enterorhabdus* | 0.03+/-0.01 | 0.07+/-0.03 | <0.01 | <0.01 |
| *Ruminiclostridium* | 0.07+/-0.04 | <0.01 | 0.01+/-0.01 | 0.03+/-0.01 |
| *Blautia* | 0.10+/-0.05 | <0.01 | 0.09+/-0.09 | <0.01 |
| *Ruminococcaceae;_* | 0.09+/-0.07 | <0.01 | 0.29+/-0.25 | 0.23+/-0.20 |
| *Rothia* | 0.07+/-0.07 | 0.02+/-0.01 | 0.16+/-0.11 | 0.09+/-0.04 |
| *Escherichia-Shigella* | 0.02+/-0.01 | 0.06+/-0.03 | 19.09+/-10.82 | 0.51+/-0.27 |
| *Parasutterella* | 0.08+/-0.04 | <0.01 | 8.34+/-3.10 | 5.53+/-2.92 |
| *[Eubacterium] xylanophilum group* | 0.06+/-0.04 | <0.01 | <0.01 | <0.01 |
| *Ruminiclostridium 5* | 0.06+/-0.06 | <0.01 | <0.01 | <0.01 |
